# Supplementary material for: CD70-Targeted Allogeneic CAR T-Cell Therapy for Advanced Clear Cell Renal Cell Carcinoma
Source: PubMed Central journal article supplement — Cancer Discov. 2024 Apr 4;14(7):1176–89. doi: 10.1158/2159-8290.CD-24-0102 (PMC11215406; doi:10.1158/2159-8290.cd-24-0102), 2024-04-04
Supplement: cd-24-0102_supplementary_figure_s1_suppsf1.pdf [file cd-24-0102_supplementary_figure_s1_suppsf1.pdf]

Supplementary Fig. S1

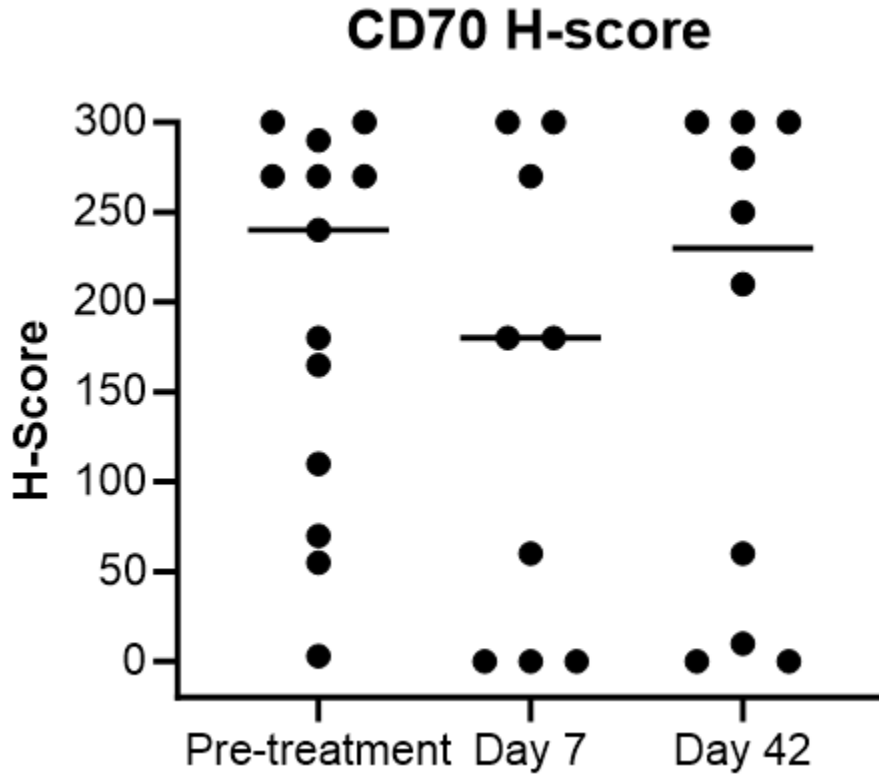

**Supplementary Fig. S1. Tumor biopsy CD70 H-scores.** The H-score is a semi-quantitative value calculated based on the intensity of staining (scored from 0 for “no signal” to 3+ for “strong signal”) and the percentage of cells stained at each intensity.  $H\text{-score} = (1 \times [\text{percentage of cells stained at “1+”}]) + (2 \times [\text{percentage of cells stained at “2+”}]) + (3 \times [\text{percentage of cells stained at “3+”}])$ . The graph shows CD70 H-score data from tumor cells pre-treatment (n=13), Day 7 after infusion (n=9), and Day 42 after infusion (n=10). Each point represents a tumor biopsy sample from 1 patient, and bars represent median values.
