# Supplementary material for: CD70-Targeted Allogeneic CAR T-Cell Therapy for Advanced Clear Cell Renal Cell Carcinoma
Source: PubMed Central journal article supplement — Cancer Discov. 2024 Apr 4;14(7):1176–89. doi: 10.1158/2159-8290.CD-24-0102 (PMC11215406; doi:10.1158/2159-8290.cd-24-0102), 2024-04-04
Supplement: cd-24-0102_supplementary_figure_s2_suppsf2.pdf [file cd-24-0102_supplementary_figure_s2_suppsf2.pdf]

**Supplementary Fig. S2**

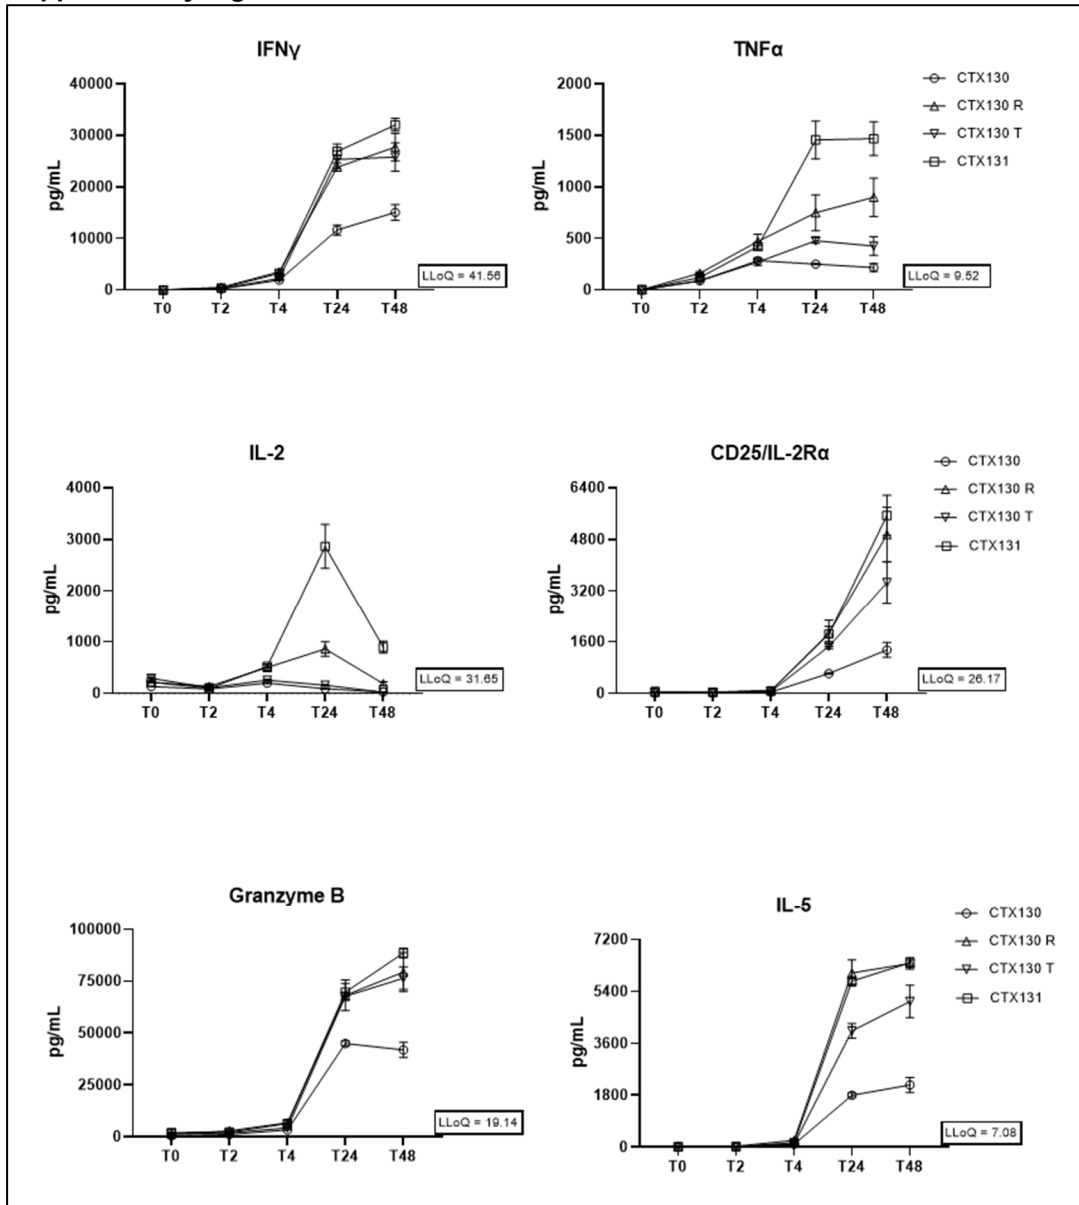

**Supplementary Figure S2. Cytokine secretion during CAR T-cell activation upon coculture with CD70<sup>+</sup> RCC cells.** Cytokines were measured using the Human Magnetic Luminex<sup>®</sup> Assay in supernatants collected at 0, 2, 4, 24, and 48 hr following coculture. LLoQ, lower limit of quantification; CTX130 R, CTX130 + Regnase-1 knockout; CTX130 T, CTX130 + TGF- $\beta$ R2 knockout.
