# Supplementary material for: CD70-Targeted Allogeneic CAR T-Cell Therapy for Advanced Clear Cell Renal Cell Carcinoma
Source: PubMed Central journal article supplement — Cancer Discov. 2024 Apr 4;14(7):1176–89. doi: 10.1158/2159-8290.CD-24-0102 (PMC11215406; doi:10.1158/2159-8290.cd-24-0102), 2024-04-04
Supplement: cd-24-0102_supplementary_figure_s3_suppsf3.pdf [file cd-24-0102_supplementary_figure_s3_suppsf3.pdf]

Supplementary Fig. S3

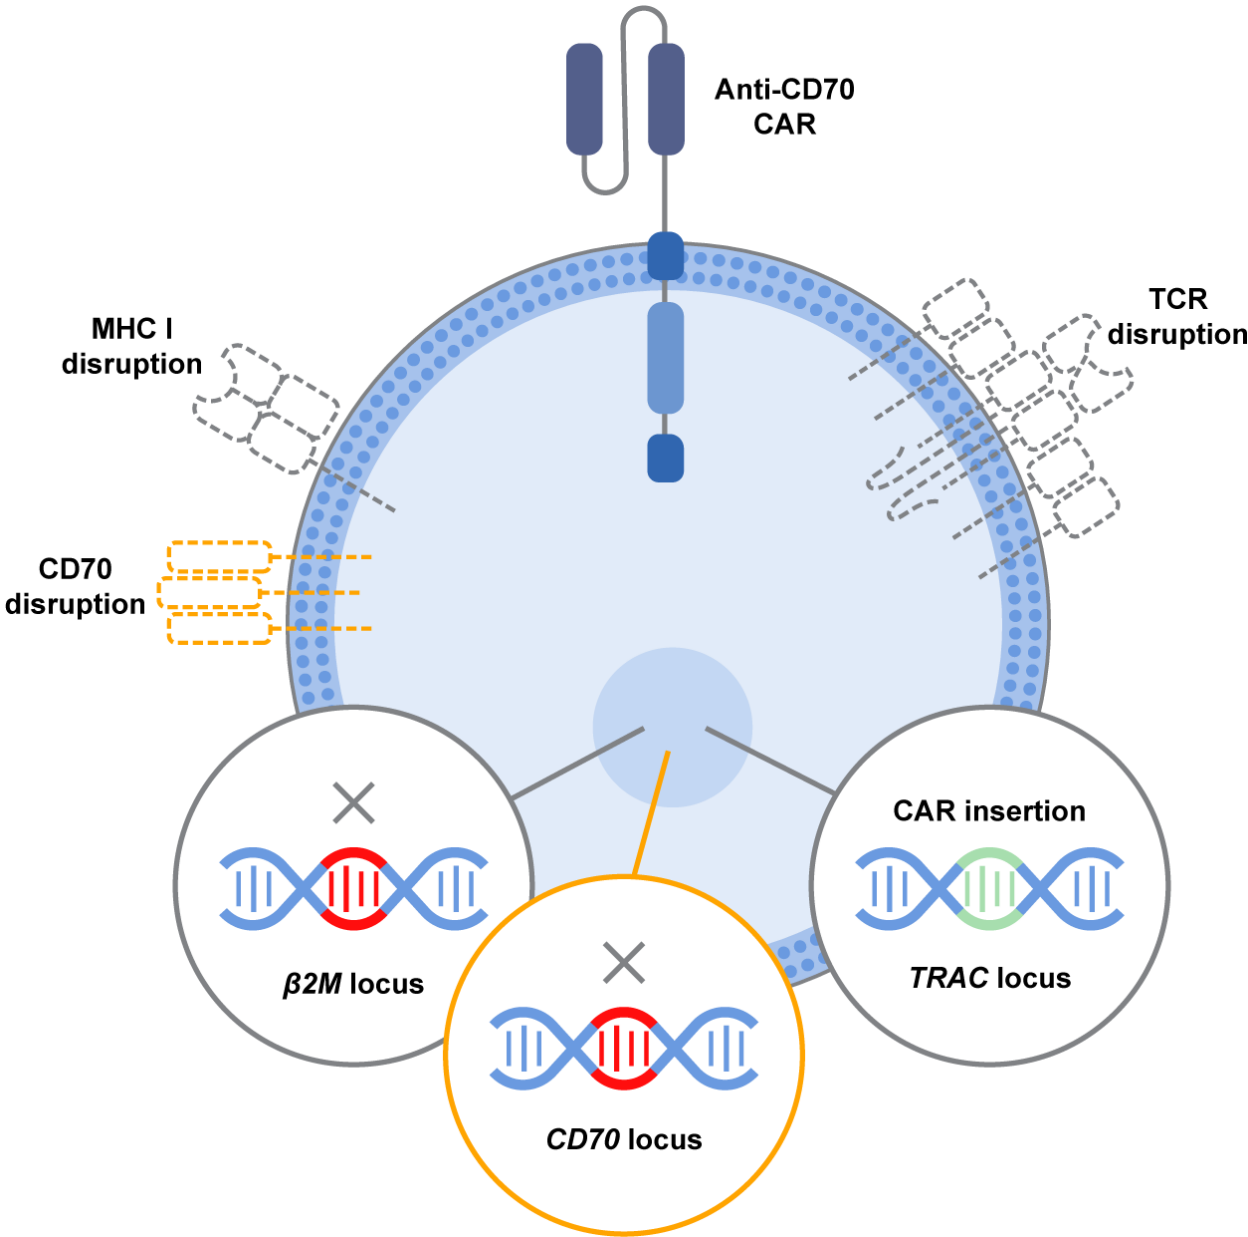

**Supplementary Fig. S3: CTX130 construct.**  $\beta 2M$ , beta 2-microglobulin; CAR, chimeric antigen receptor; CD, cluster of differentiation; MHC, major histocompatibility complex; TCR, T-cell receptor; TRAC, T-cell receptor alpha constant.
