# Supplementary material for: CD70-Targeted Allogeneic CAR T-Cell Therapy for Advanced Clear Cell Renal Cell Carcinoma
Source: PubMed Central journal article supplement — Cancer Discov. 2024 Apr 4;14(7):1176–89. doi: 10.1158/2159-8290.CD-24-0102 (PMC11215406; doi:10.1158/2159-8290.cd-24-0102), 2024-04-04
Supplement: cd-24-0102_supplementary_figure_s4_suppsf4.pdf [file cd-24-0102_supplementary_figure_s4_suppsf4.pdf]

Supplementary Fig. S4

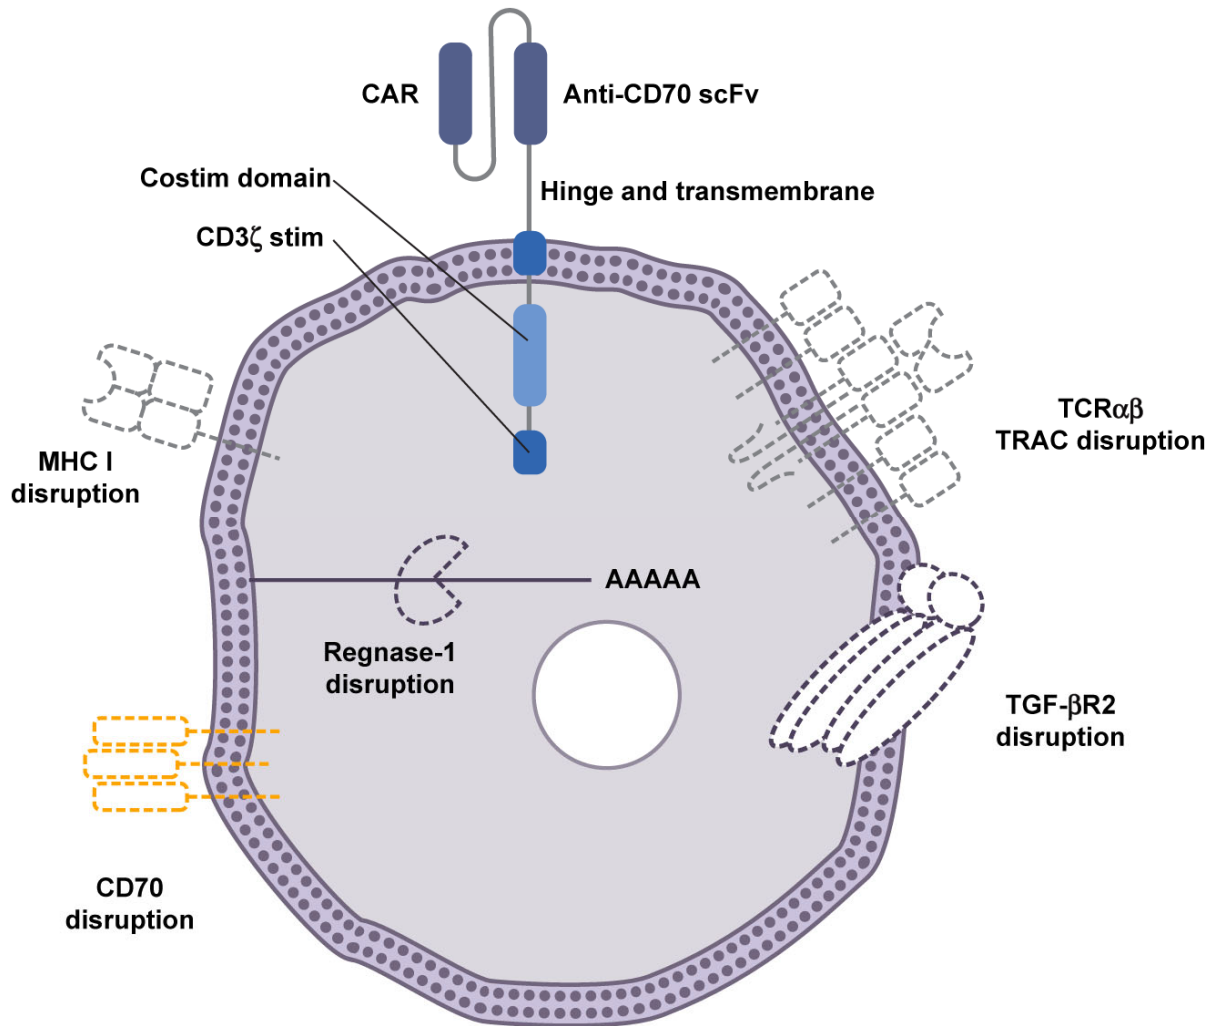

**Supplementary Fig. S4: CTX131 construct.** *CAR*, chimeric antigen receptor; *CD*, cluster of differentiation; *MHC*, major histocompatibility complex; *scFv*, single-chain variable fragment; *TCR*, T-cell receptor; *TGF-βR2*, transforming growth factor β receptor 2; *TRAC*, T-cell receptor alpha constant.
