# Supplementary material for: CD70-Targeted Allogeneic CAR T-Cell Therapy for Advanced Clear Cell Renal Cell Carcinoma
Source: PubMed Central journal article supplement — Cancer Discov. 2024 Apr 4;14(7):1176–89. doi: 10.1158/2159-8290.CD-24-0102 (PMC11215406; doi:10.1158/2159-8290.cd-24-0102), 2024-04-04
Supplement: cd-24-0102_supplementary_figure_s5_suppsf5.pdf [file cd-24-0102_supplementary_figure_s5_suppsf5.pdf]

## Supplementary Fig. S5

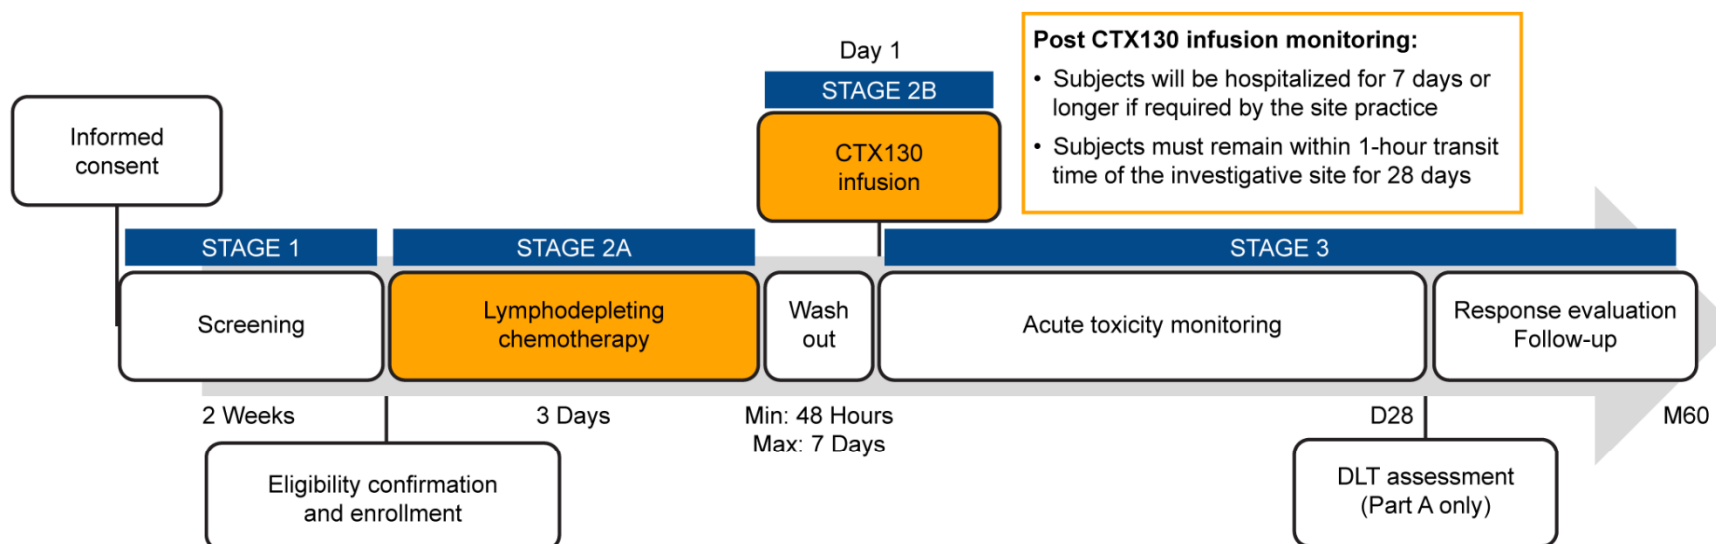

- **Stage 1:** Screening to determine eligibility for treatment (1-2 weeks)
- **Stage 2A:** LD chemotherapy: **fludarabine 30 mg/m<sup>2</sup> and cyclophosphamide 500 mg/m<sup>2</sup> IV daily for 3 days**
- **Stage 2B:**
  - CTX130 infusion as a **flat dose of CAR T cells**
  - Potential for redosing up to 2 times in subjects with CR/PR and evidence of PD, SD, or PD after significant clinical benefit
  - Redosing may occur at M2 based on Day 42 CT
- **Stage 3:** Follow-up (up to 5 years) after the last infusion of CTX130

**Supplementary Fig. S5: COBALT-RCC trial design schematic.** *CAR, chimeric antigen receptor; CR, complete response; CT, computed tomography; DLT, dose-limiting toxicity; IV, intravenous; LD, lymphodepleting; PD, progressive disease; PR, partial response; SD, stable disease.*
