# Supplementary material for: CD70-Targeted Allogeneic CAR T-Cell Therapy for Advanced Clear Cell Renal Cell Carcinoma
Source: PubMed Central journal article supplement — Cancer Discov. 2024 Apr 4;14(7):1176–89. doi: 10.1158/2159-8290.CD-24-0102 (PMC11215406; doi:10.1158/2159-8290.cd-24-0102), 2024-04-04
Supplement: cd-24-0102_supplementary_figure_s6_suppsf6.pdf [file cd-24-0102_supplementary_figure_s6_suppsf6.pdf]

Supplementary Fig. S6

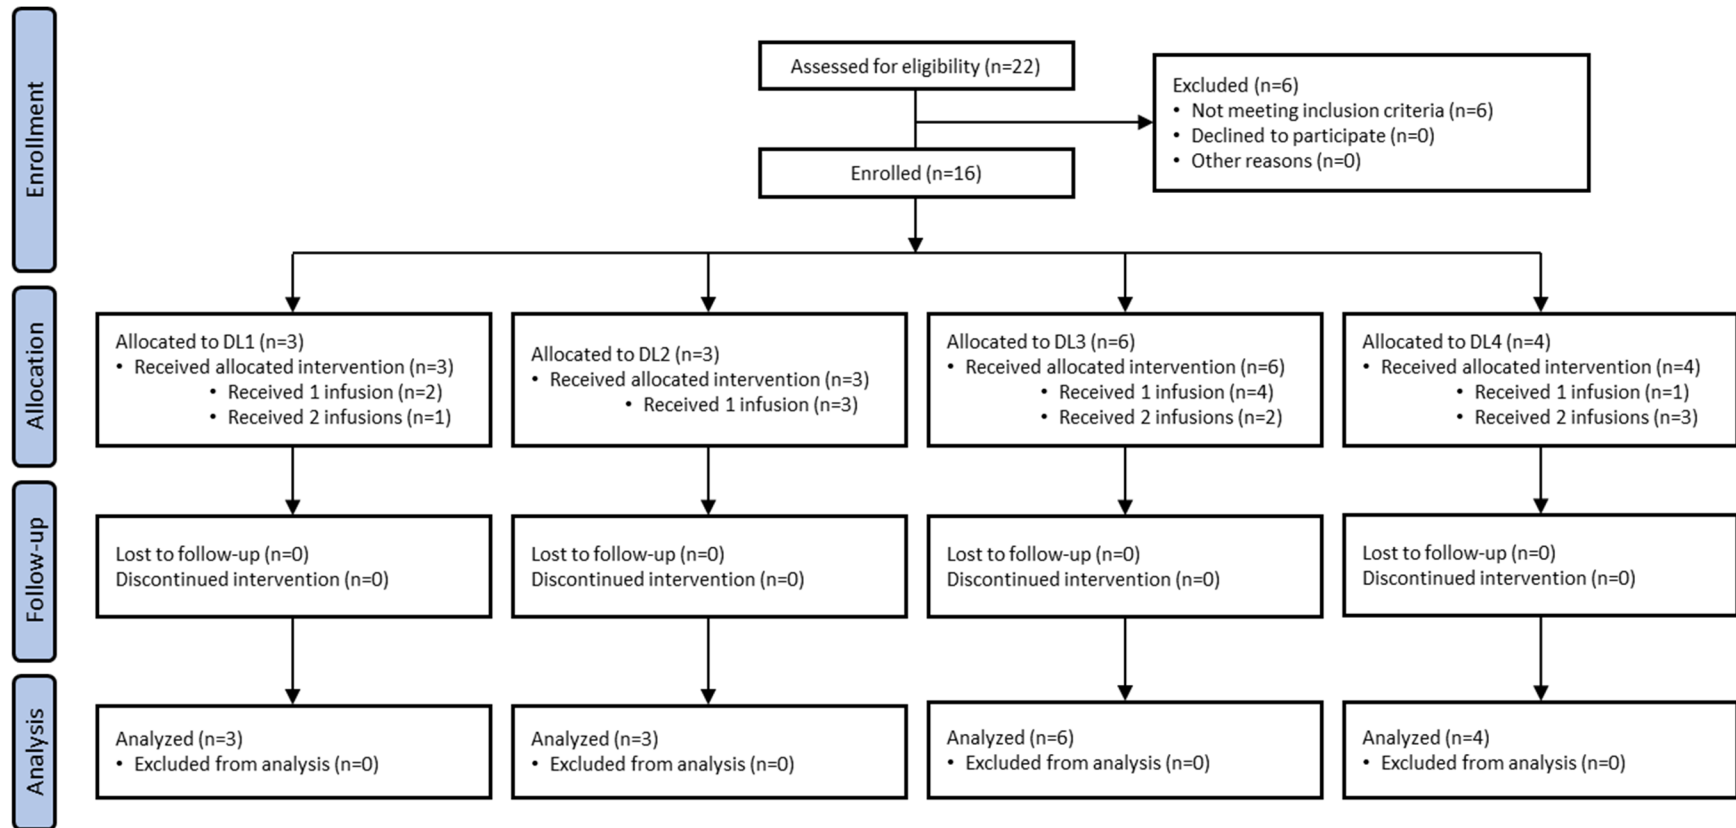

Supplementary Fig. S6: CONSORT flow diagram for COBALT-RCC trial design schematic. DL, dose level.
