# Supplementary material for: CD70-Targeted Allogeneic CAR T-Cell Therapy for Advanced Clear Cell Renal Cell Carcinoma
Source: PubMed Central journal article supplement — Cancer Discov. 2024 Apr 4;14(7):1176–89. doi: 10.1158/2159-8290.CD-24-0102 (PMC11215406; doi:10.1158/2159-8290.cd-24-0102), 2024-04-04
Supplement: cd-24-0102_supplementary_table_s1_suppst1.pdf [file cd-24-0102_supplementary_table_s1_suppst1.pdf]

**Supplementary Table S1: Summary of Treatment-Related TEAEs in Safety Analysis Set by Dose Level**

|                                                             | <b>DL1</b><br><b>3 × 10<sup>7</sup></b><br><b>N=3</b> | <b>DL2</b><br><b>1 × 10<sup>8</sup></b><br><b>N=3</b> | <b>DL3</b><br><b>3 × 10<sup>8</sup></b><br><b>N=6</b> | <b>DL4</b><br><b>9 × 10<sup>8</sup></b><br><b>N=4</b> | <b>Total</b><br><b>N=16</b> |
|-------------------------------------------------------------|-------------------------------------------------------|-------------------------------------------------------|-------------------------------------------------------|-------------------------------------------------------|-----------------------------|
| <b>CAR T-cell dose</b>                                      |                                                       |                                                       |                                                       |                                                       |                             |
| Patients with any TEAEs related to CTX130, n (%)            | 1 (33.3)                                              | 2 (66.7)                                              | 5 (83.3)                                              | 4 (100.0)                                             | 12 (75.0)                   |
| General disorders and administration site conditions, n (%) | 1 (33.3)                                              | 1 (33.3)                                              | 2 (33.3)                                              | 3 (75.0)                                              | 7 (43.8)                    |
| Fatigue                                                     | 1 (33.3)                                              | –                                                     | 2 (33.3)                                              | 2 (50.0)                                              | 5 (31.3)                    |
| Chills                                                      | –                                                     | –                                                     | –                                                     | –                                                     | –                           |
| Pyrexia                                                     | –                                                     | 1 (33.3)                                              | –                                                     | 2 (50.0)                                              | 3 (18.8)                    |
| Influenza-like illness                                      | –                                                     | –                                                     | –                                                     | 1 (25.0)                                              | 1 (6.3)                     |
| Pain                                                        | –                                                     | –                                                     | –                                                     | –                                                     | –                           |
| Immune system disorders, n (%)                              | –                                                     | –                                                     | 4 (66.7)                                              | 4 (100.0)                                             | 8 (50.0)                    |
| Cytokine release syndrome                                   | –                                                     | –                                                     | 4 (66.7)                                              | 4 (100.0)                                             | 8 (50.0)                    |
| Skin and subcutaneous tissue disorders, n (%)               | –                                                     | –                                                     | 2 (33.3)                                              | –                                                     | 2 (12.5)                    |
| Hyperhidrosis                                               | –                                                     | –                                                     | 1 (16.7)                                              | –                                                     | 1 (6.3)                     |
| Rash maculo-papular                                         | –                                                     | –                                                     | 1 (16.7)                                              | –                                                     | 1 (6.3)                     |
| Alopecia                                                    | –                                                     | –                                                     | –                                                     | –                                                     | –                           |
| Pruritus                                                    | –                                                     | –                                                     | –                                                     | –                                                     | –                           |
| Blood and lymphatic system disorders, n (%)                 | –                                                     | –                                                     | 2 (33.3)                                              | 1 (25.0)                                              | 3 (18.8)                    |
| Anemia                                                      | –                                                     | –                                                     | –                                                     | 1 (25.0)                                              | 1 (6.3)                     |
| Febrile neutropenia                                         | –                                                     | –                                                     | 2 (33.3)                                              | –                                                     | 2 (12.5)                    |
| Neutropenia                                                 | –                                                     | –                                                     | –                                                     | 1 (25.0)                                              | 1 (6.3)                     |
| Investigations n (%)                                        | –                                                     | 1 (33.3)                                              | 1 (16.7)                                              | 2 (50.0)                                              | 4 (25.0)                    |
| Aspartate aminotransferase increased                        | –                                                     | 1 (33.3)                                              | –                                                     | –                                                     | 1 (6.3)                     |
| Blood creatinine increased                                  | –                                                     | –                                                     | –                                                     | 1 (25.0)                                              | 1 (6.3)                     |
| Weight decreased                                            | –                                                     | –                                                     | 1 (16.7)                                              | 1 (25.0)                                              | 2 (12.5)                    |
| Gastrointestinal disorders, n (%)                           | –                                                     | –                                                     | 1 (16.7)                                              | 2 (50.0)                                              | 3 (18.8)                    |
| Abdominal pain                                              | –                                                     | –                                                     | –                                                     | 2 (50.0)                                              | 2 (12.5)                    |
| Diarrhea                                                    | –                                                     | –                                                     | 1 (16.7)                                              | –                                                     | 1 (6.3)                     |
| Nausea                                                      | –                                                     | –                                                     | 1 (16.7)                                              | –                                                     | 1 (6.3)                     |
| Stomatitis                                                  | –                                                     | –                                                     | –                                                     | –                                                     | –                           |
| Toothache                                                   | –                                                     | –                                                     | –                                                     | –                                                     | –                           |
| Infections and infestations, n (%)                          | –                                                     | –                                                     | –                                                     | 2 (50.0)                                              | 2 (12.5)                    |
| Folliculitis                                                | –                                                     | –                                                     | –                                                     | –                                                     | –                           |
| Mucosal infection                                           | –                                                     | –                                                     | –                                                     | –                                                     | –                           |

|                                                         |          |   |   |          |          |
|---------------------------------------------------------|----------|---|---|----------|----------|
| Upper respiratory tract infection                       | —        | — | — | 1 (25.0) | 1 (6.3)  |
| Urinary tract infection                                 | —        | — | — | 1 (25.0) | 1 (6.3)  |
| Metabolism and nutrition disorders, n (%)               | 1 (33.3) | — | — | 1 (25.0) | 2 (12.5) |
| Decreased appetite                                      | 1 (33.3) | — | — | 1 (25.0) | 2 (12.5) |
| Hypokalemia                                             | —        | — | — | —        | —        |
| Respiratory, thoracic, and mediastinal disorders, n (%) | —        | — | — | 1 (25.0) | 1 (6.3)  |
| Dyspnea                                                 | —        | — | — | 1 (25.0) | 1 (6.3)  |
| Eye disorders, n (%)                                    | 1 (33.3) | — | — | —        | 1 (6.3)  |
| Visual impairment                                       | 1 (33.3) | — | — | —        | 1 (6.3)  |
| Musculoskeletal and connective tissue disorders, n (%)  | —        | — | — | 1 (25.0) | 1 (6.3)  |
| Arthralgia                                              | —        | — | — | 1 (25.0) | 1 (6.3)  |
| Myalgia                                                 | —        | — | — | —        | —        |
| Nervous system disorders, n (%)                         | —        | — | — | 1 (25.0) | 1 (6.3)  |
| Dizziness                                               | —        | — | — | —        | —        |
| Dysgeusia                                               | —        | — | — | 1 (25.0) | 1 (6.3)  |
| Hyperesthesia                                           | —        | — | — | —        | —        |
| Vascular disorders, n (%)                               | —        | — | — | —        | —        |
| Hypotension                                             | —        | — | — | —        | —        |

---

*CAR, chimeric antigen receptor; DL, dose level; TEAE, treatment-emergent adverse event.*
