# Supplementary material for: CD70-Targeted Allogeneic CAR T-Cell Therapy for Advanced Clear Cell Renal Cell Carcinoma
Source: PubMed Central journal article supplement — Cancer Discov. 2024 Apr 4;14(7):1176–89. doi: 10.1158/2159-8290.CD-24-0102 (PMC11215406; doi:10.1158/2159-8290.cd-24-0102), 2024-04-04
Supplement: cd-24-0102_supplementary_table_s2_suppst2.pdf [file cd-24-0102_supplementary_table_s2_suppst2.pdf]

**Supplementary Table S2: Flow Cytometry Antibody Panel**

| <b>Surface marker</b> | <b>Color</b> | <b>Source</b>                            | <b>Biological relevance</b>                                                                        |
|-----------------------|--------------|------------------------------------------|----------------------------------------------------------------------------------------------------|
| Human CD45            | BV785        | BioLegend 304048<br>RRID: AB_2563129     | Human leukocyte lineage                                                                            |
| Mouse CD45            | PerCP        | BioLegend 103130<br>RRID: AB_893339      | Mouse leukocyte lineage                                                                            |
| CD3                   | FITC         | BioLegend 317306<br>RRID: AB_571907      | T-cell lineage                                                                                     |
| CD4                   | BV510        | BioLegend 357420<br>RRID: AB_2715940     |                                                                                                    |
| CD8                   | Pacific Blue | BioLegend 344718<br>RRID: AB_10551438    |                                                                                                    |
| Anti-CD70 CAR         | Biotin       | CRISPR Therapeutics<br>Clone 20H05-02D09 | CAR T cells including:<br>CTX130<br>CTX130 + Regnase-1 KO<br>CTX130 + TGF- $\beta$ R2 KO<br>CTX131 |
| Streptavidin          | APC          | BioLegend 405207                         |                                                                                                    |
